# Supplementary material
Source: Research Square preprint supplement (doi:10.21203/rs.3.rs-9993564/v1)
Supplement: Supplementary file 1 [file 3cc00fdbaa43f9e26254c20b.xlsx]

## Sheet: Sheet1
Group	Relative Purchasing Power Loss (%)
Gansu Province Urban Top 20%	3.99473
Gansu Province Urban Bottom 20%	4.87819
Gansu Province Rural Top 20%	4.02695
Gansu Province Rural Bottom 20%	4.64916
Henan Province Urban Top 20%	3.92062
Henan Province Urban Bottom 20%	4.02452
Henan Province Rural Top 20%	4.00674
Henan Province Rural Bottom 20%	4.4074
Guangdong Province Urban Top 20%	3.7512
Guangdong Province Urban Bottom 20%	5.73183
Guangdong Province Rural Top 20%	5.01306
Guangdong Province Rural Bottom 20%	6.09993
Liaoning Province Urban Top 20%	3.86134
Liaoning Province Urban Bottom 20%	4.68638
Liaoning Province Rural Top 20%	4.6727
Liaoning Province Rural Bottom 20%	4.8646
Hebei Province Urban Top 20%	3.64388
Hebei Province Urban Bottom 20%	5.13116
Hebei Province Rural Top 20%	4.58717
Hebei Province Rural Bottom 20%	5.86366
Shanghai Municipality Urban Top 20%	3.46947
Shanghai Municipality Urban Bottom 20%	4.96155
Shandong Province Urban Top 20%	3.74421
Shandong Province Urban Bottom 20%	5.69209
Shandong Province Rural Top 20%	4.38173
Shandong Province Rural Bottom 20%	4.82303
Shanxi Province Urban Top 20%	3.97088
Shanxi Province Urban Bottom 20%	4.51889
Shanxi Province Rural Top 20%	4.3888
Shanxi Province Rural Bottom 20%	5.03311
Sichuan Province Urban Top 20%	3.77745
Sichuan Province Urban Bottom 20%	5.84528
Sichuan Province Rural Top 20%	4.0581
Sichuan Province Rural Bottom 20%	4.89304
Yunnan Province Urban Top 20%	4.08752
Yunnan Province Urban Bottom 20%	4.36212
Yunnan Province Rural Top 20%	4.48994
Yunnan Province Rural Bottom 20%	4.82647
Heilongjiang Province Urban Top 20%	4.75199
Heilongjiang Province Urban Bottom 20%	5.20388
Hunan Province Urban Top 20%	3.39717
Hunan Province Urban Bottom 20%	4.94386
Guizhou Province Urban Top 20%	3.71461
Guizhou Province Urban Bottom 20%	5.25018
Guizhou Province Rural Top 20%	4.3191
Guizhou Province Rural Bottom 20%	5.30872
Shaanxi Province Urban Top 20%	3.95645
Shaanxi Province Urban Bottom 20%	4.92906
Shaanxi Province Rural Top 20%	4.04198
Shaanxi Province Rural Bottom 20%	5.1275
Zhejiang Province Urban Top 20%	3.83107
Zhejiang Province Urban Bottom 20%	4.73998
Jiangsu Province Urban Top 20%	3.47188
Jiangsu Province Urban Bottom 20%	5.4151
Jilin Province Urban Top 20%	4.28278
Jilin Province Urban Bottom 20%	5.20418
Anhui Province Urban Top 20%	4.58279
Anhui Province Urban Bottom 20%	6.4622
Guangxi Province Rural Top 20%	4.58016
Guangxi Province Rural Bottom 20%	5.66314
Jiangxi Province Rural Top 20%	4.782
Jiangxi Province Rural Bottom 20%	5.75914
