# Supplementary material
Source: Research Square preprint supplement (doi:10.21203/rs.3.rs-9993564/v1)
Supplement: Supplementary file 2 [file 4422c745aab729a98e1a8ea0.xlsx]

## Sheet: Sheet1
Group	Theil Index	Generalized Entropy Index (α=2)	Theil Index	Generalized Entropy Index (α=2)
Gansu Province Urban	0.0154222	0.0105901	0.00162863	0.00110824
Gansu Province Rural	0.0429927	0.0299727	0.00113949	0.000773131
Henan Province Urban	0.047713	0.0353477	0.000210667	0.000151862
Henan Province Rural	0.00384809	0.00262143	0.000735501	0.000500006
Guangdong Province Urban	-0.0526127	-0.0346605	0.00370711	0.00253871
Guangdong Province Rural	0.0196839	0.01271	0.00177015	0.00112771
Liaoning Province Urban	-0.0465571	-0.0342882	0.00179561	0.00135852
Liaoning Province Rural	0.0518361	0.0346743	0.000318263	0.000205226
Hebei Province Urban	0.0943762	0.0596659	0.00195331	0.00114341
Hebei Province Rural	0.00394145	0.00261078	0.00224504	0.00148531
Shanghai Municipality Urban	0.10802	0.0702864	0.0020702	0.00123932
Shandong Province Urban	-0.00343207	-0.00227195	0.00344506	0.00229157
Shandong Province Rural	-0.0117763	-0.00771823	0.000770364	0.000509444
Shanxi Province Urban	0.027222	0.0183196	0.000951735	0.000628955
Shanxi Province Rural	-0.0148223	-0.00957796	0.00109971	0.000718965
Sichuan Province Urban	-0.0164336	-0.00994076	0.00308134	0.00189484
Sichuan Province Rural	0.021168	0.013643	0.00133438	0.000847232
Yunnan Province Urban	-0.0378167	-0.0258154	0.000531529	0.000371974
Yunnan Province Rural	0.00372644	0.00248067	0.000593112	0.00039397
Heilongjiang Province Urban	0.0108249	0.00812522	0.000974074	0.000727188
Hunan Province Urban	0.0271875	0.0197911	0.00312099	0.00223997
Guizhou Province Urban	-0.065355	-0.0424913	0.00284456	0.00194012
Guizhou Province Rural	0.0844776	0.055958	0.00151931	0.000946261
Shaanxi Province Urban	-0.101107	-0.065504	0.00186808	0.00129986
Shaanxi Province Rural	0.018629	0.0115624	0.00159582	0.000976748
Zhejiang Province Urban	-0.14724	-0.114148	0.00212507	0.00177206
Jiangsu Province Urban	0.022046	0.01484	0.00342065	0.00227326
Jilin Province Urban	0.0484387	0.0363385	0.0019233	0.00140568
Anhui Province Urban	-0.0121952	-0.00858694	0.00378938	0.0026946
Guangxi Province Rural	0.0292855	0.0206055	0.00207235	0.00143328
Jiangxi Province Rural	0.095959	0.0639722	0.00150152	0.000933608
