# Supplementary material
Source: Research Square preprint supplement (doi:10.21203/rs.3.rs-9993564/v1)
Supplement: Supplementary file 3 [file 65f8d0c4b878c8fe27873336.xlsx]

## Sheet: Sheet1
Group	Top 20% Income		Bottom 20% Income
	D-CPI	GEKS	D-CPI	GEKS
Gansu Province Urban	104.161	1.02059	105.128	1.02532
Gansu Province Rural	104.196	1.02076	104.876	1.02409
Henan Province Urban	104.081	1.0202	104.193	1.02075
Henan Province Rural	104.174	1.02066	104.611	1.02279
Guangdong Province Urban	103.897	1.0193	106.08	1.02995
Guangdong Province Rural	105.278	1.02605	106.496	1.03197
Liaoning Province Urban	104.016	1.01988	104.917	1.02429
Liaoning Province Rural	104.902	1.02422	105.113	1.02525
Hebei Province Urban	103.782	1.01873	105.409	1.02669
Hebei Province Rural	104.808	1.02376	106.229	1.03067
Shanghai Municipality Urban	103.594	1.01781	105.221	1.02577
Shandong Province Urban	103.89	1.01926	106.036	1.02974
Shandong Province Rural	104.583	1.02266	105.067	1.02502
Shanxi Province Urban	104.135	1.02047	104.733	1.02339
Shanxi Province Rural	104.59	1.02269	105.3	1.02616
Sichuan Province Urban	103.926	1.01944	106.208	1.03057
Sichuan Province Rural	104.23	1.02093	105.145	1.0254
Yunnan Province Urban	104.262	1.02109	104.561	1.02255
Yunnan Province Rural	104.701	1.02324	105.071	1.02504
Heilongjiang Province Urban	104.989	1.02464	105.49	1.02708
Hunan Province Urban	103.517	1.01743	105.201	1.02568
Guizhou Province Urban	103.858	1.01911	105.541	1.02733
Guizhou Province Rural	104.514	1.02232	105.606	1.02765
Shaanxi Province Urban	104.119	1.02039	105.185	1.0256
Shaanxi Province Rural	104.212	1.02084	105.405	1.02667
Zhejiang Province Urban	103.984	1.01972	104.976	1.02458
Jiangsu Province Urban	103.597	1.01782	105.725	1.02823
Jilin Province Urban	104.474	1.02213	105.49	1.02708
Anhui Province Urban	104.803	1.02373	106.909	1.03397
Guangxi Province Rural	104.8	1.02372	106.003	1.02958
Jiangxi Province Rural	105.022	1.0248	106.111	1.0301
