# Supplementary material
Source: Research Square preprint supplement (doi:10.21203/rs.3.rs-9993564/v1)
Supplement: Supplementary file 4 [file 6baa4b5110c67f7bd1dfe9ef.xlsx]

## Sheet: Sheet1
Group	D-CPI（%）
Gansu Province Urban Top 20%	104.161
Gansu Province Urban Bottom 20%	105.128
Gansu Province Rural Top 20%	104.196
Gansu Province Rural Bottom 20%	104.876
Henan Province Urban Top 20%	104.081
Henan Province Urban Bottom 20%	104.193
Henan Province Rural Top 20%	104.174
Henan Province Rural Bottom 20%	104.611
Guangdong Province Urban Top 20%	103.897
Guangdong Province Urban Bottom 20%	106.08
Guangdong Province Rural Top 20%	105.278
Guangdong Province Rural Bottom 20%	106.496
Liaoning Province Urban Top 20%	104.016
Liaoning Province Urban Bottom 20%	104.917
Liaoning Province Rural Top 20%	104.902
Liaoning Province Rural Bottom 20%	105.113
Hebei Province Urban Top 20%	103.782
Hebei Province Urban Bottom 20%	105.409
Hebei Province Rural Top 20%	104.808
Hebei Province Rural Bottom 20%	106.229
Shanghai Municipality Urban Top 20%	103.594
Shanghai Municipality Urban Bottom 20%	105.221
Shandong Province Urban Top 20%	103.89
Shandong Province Urban Bottom 20%	106.036
Shandong Province Rural Top 20%	104.583
Shandong Province Rural Bottom 20%	105.067
Shanxi Province Urban Top 20%	104.135
Shanxi Province Urban Bottom 20%	104.733
Shanxi Province Rural Top 20%	104.59
Shanxi Province Rural Bottom 20%	105.3
Sichuan Province Urban Top 20%	103.926
Sichuan Province Urban Bottom 20%	106.208
Sichuan Province Rural Top 20%	104.23
Sichuan Province Rural Bottom 20%	105.145
Yunnan Province Urban Top 20%	104.262
Yunnan Province Urban Bottom 20%	104.561
Yunnan Province Rural Top 20%	104.701
Yunnan Province Rural Bottom 20%	105.071
Heilongjiang Province Urban Top 20%	104.989
Heilongjiang Province Urban Bottom 20%	105.49
Hunan Province Urban Top 20%	103.517
Hunan Province Urban Bottom 20%	105.201
Guizhou Province Urban Top 20%	103.858
Guizhou Province Urban Bottom 20%	105.541
Guizhou Province Rural Top 20%	104.514
Guizhou Province Rural Bottom 20%	105.606
Shaanxi Province Urban Top 20%	104.119
Shaanxi Province Urban Bottom 20%	105.185
Shaanxi Province Rural Top 20%	104.212
Shaanxi Province Rural Bottom 20%	105.405
Zhejiang Province Urban Top 20%	103.984
Zhejiang Province Urban Bottom 20%	104.976
Jiangsu Province Urban Top 20%	103.597
Jiangsu Province Urban Bottom 20%	105.725
Jilin Province Urban Top 20%	104.474
Jilin Province Urban Bottom 20%	105.49
Anhui Province Urban Top 20%	104.803
Anhui Province Urban Bottom 20%	106.909
Guangxi Province Rural Top 20%	104.8
Guangxi Province Rural Bottom 20%	106.003
Jiangxi Province Rural Top 20%	105.022
Jiangxi Province Rural Bottom 20%	106.111
