# Supplementary material
Source: Research Square preprint supplement (doi:10.21203/rs.3.rs-9993564/v1)
Supplement: Supplementary file 5 [file 8a5f694f18ca62790239f8d1.xlsx]

## Sheet: Sheet1
Group	Urban-Rural Inflation Redistribution Effect（ΔTinflation）
Gansu Province Urban	0.00162863
Gansu Province Rural	0.00113949
Henan Province Urban	0.000210667
Henan Province Rural	0.000735501
Guangdong Province Urban	0.00370711
Guangdong Province Rural	0.00177015
Liaoning Province Urban	0.00179561
Liaoning Province Rural	0.000318263
Hebei Province Urban	0.00195331
Hebei Province Rural	0.00224504					Group	Urban-Rural Inflation Redistribution Effect
Shanghai Municipality Urban	0.0020702
Shandong Province Urban	0.00344506
Shandong Province Rural	0.000770364
Shanxi Province Urban	0.000951735
Shanxi Province Rural	0.00109971
Sichuan Province Urban	0.00308134
Sichuan Province Rural	0.00133438
Yunnan Province Urban	0.000531529
Yunnan Province Rural	0.000593112
Heilongjiang Province Urban	0.000974074
Hunan Province Urban	0.00312099
Guizhou Province Urban	0.00284456
Guizhou Province Rural	0.00151931
Shaanxi Province Urban	0.00186808
Shaanxi Province Rural	0.00159582
Zhejiang Province Urban	0.00212507
Jiangsu Province Urban	0.00342065
Jilin Province Urban	0.0019233
Anhui Province Urban	0.00378938
Guangxi ProvinceRural	0.00207235
Jiangxi Province Rural	0.00150152
