# Supplementary material
Source: Research Square preprint supplement (doi:10.21203/rs.3.rs-9993564/v1)
Supplement: Supplementary file 6 [file d8df5894390e276f396152f9.xlsx]

## Sheet: Sheet1
Region	Distributed CPI		Purchasing Power Loss
	20% Group	10% Group	20% Group	10% Group
Gansu Province Urban Highest Income Group	104.161	104.414	3.99473	4.2276
Gansu Province Urban Lowest Income Group	105.128	104.929	4.87819	4.6973
Gansu Province Rural Highest Income Group	104.196	104.412	4.02695	4.22514
Gansu Province Rural Lowest Income Group	104.876	105.285	4.64916	5.01982
Henan Province Urban Highest Income Group	104.081	104.122	3.92062	3.95859
Henan Province Urban Lowest Income Group	104.193	103.887	4.02452	3.74185
Henan Province Rural Highest Income Group	104.174	104.705	4.00674	4.4936
Henan Province Rural Lowest Income Group	104.611	104.16	4.4074	3.99364
Guangdong Province Urban Highest Income Group	103.897	104.045	3.7512	3.88793
Guangdong Province Urban Lowest Income Group	106.08	106.5	5.73183	6.10289
Guangdong Province Rural Highest Income Group	105.278	105.645	5.01306	5.34374
Guangdong Province Rural Lowest Income Group	106.496	107.677	6.09993	7.12957
Liaoning Province Urban Highest Income Group	104.016	104.348	3.86134	4.16645
Liaoning Province Urban Lowest Income Group	104.917	104.743	4.68638	4.52853
Liaoning Province Rural Highest Income Group	104.902	105.129	4.6727	4.87832
Liaoning Province Rural Lowest Income Group	105.113	105.514	4.8646	5.2258
Hebei Province Urban Highest Income Group	103.782	103.499	3.64388	3.38028
Hebei Province Urban Lowest Income Group	105.409	105.71	5.13116	5.40165
Hebei Province Rural Highest Income Group	104.808	104.927	4.58717	4.69535
Hebei Province Rural Lowest Income Group	106.229	106.218	5.86366	5.85441
Shanghai Municipality Urban Highest Income Group	103.594	104.03	3.46947	3.87375
Shanghai Municipality Urban Lowest Income Group	105.221	104.897	4.96155	4.66841
Shandong Province Urban Highest Income Group	103.89	103.834	3.74421	3.69243
Shandong Province Urban Lowest Income Group	106.036	106.387	5.69209	6.00339
Shandong Province Rural Highest Income Group	104.583	104.749	4.38173	4.5335
Shandong Province Rural Lowest Income Group	105.067	105.657	4.82303	5.3537
Shanxi Province Urban Highest Income Group	104.135	104.474	3.97088	4.28268
Shanxi Province Urban Lowest Income Group	104.733	104.67	4.51889	4.4617
Shanxi Province Rural Highest Income Group	104.59	104.511	4.3888	4.3167
Shanxi Province Rural Lowest Income Group	105.3	105.866	5.03311	5.54089
Sichuan Province Urban Highest Income Group	103.926	103.913	3.77745	3.76554
Sichuan Province Urban Lowest Income Group	106.208	106.605	5.84528	6.19557
Sichuan Province Rural Highest Income Group	104.23	104.358	4.0581	4.17618
Sichuan Province Rural Lowest Income Group	105.145	105.486	4.89304	5.20063
Yunnan Province Urban Highest Income Group	104.262	105.261	4.08752	4.99829
Yunnan Province Urban Lowest Income Group	104.561	103.944	4.36212	3.79476
Yunnan Province Rural Highest Income Group	104.701	104.774	4.48994	4.5567
Yunnan Province Rural Lowest Income Group	105.071	105.282	4.82647	5.0167
Heilongjiang Province Urban Highest Income Group	104.989	105.018	4.75199	4.77798
Heilongjiang Province Urban Lowest Income Group	105.49	105.057	5.20388	4.81398
Hunan Province Urban Highest Income Group	103.517	103.349	3.39717	3.24049
Hunan Province Urban Lowest Income Group	105.201	105.96	4.94386	5.62481
Guizhou Province Urban Highest Income Group	103.858	104.69	3.71461	4.47984
Guizhou Province Urban Lowest Income Group	105.541	105.244	5.25018	4.98285
Guizhou Province Rural Highest Income Group	104.514	104.56	4.3191	4.36115
Guizhou Province Rural Lowest Income Group	105.606	105.528	5.30872	5.23855
Shaanxi Province Urban Highest Income Group	104.119	104.404	3.95645	4.21798
Shaanxi Province Urban Lowest Income Group	105.185	106.08	4.92906	5.73124
Shaanxi Province Rural Highest Income Group	104.212	104.284	4.04198	4.10846
Shaanxi Province Rural Lowest Income Group	105.405	104.867	5.1275	4.64142
Zhejiang Province Urban Highest Income Group	103.984	103.831	3.83107	3.68947
Zhejiang Province Urban Lowest Income Group	104.976	105.655	4.73998	5.35222
Jiangsu Province Urban Highest Income Group	103.597	103.7	3.47188	3.56783
Jiangsu Province Urban Lowest Income Group	105.725	106.191	5.4151	5.83046
Jilin Province Urban Highest Income Group	104.474	104.492	4.28278	4.2987
Jilin Province Urban Lowest Income Group	105.49	105.558	5.20418	5.26511
Anhui Province Urban Highest Income Group	104.803	104.709	4.58279	4.49704
Anhui Province Urban Lowest Income Group	106.909	107.279	6.4622	6.78519
Guangxi Province Rural Highest Income Group	104.8	104.662	4.58016	4.45463
Guangxi Province Rural Lowest Income Group	106.003	105.92	5.66314	5.58931
Jiangxi Province Rural Highest Income Group	105.022	104.776	4.782	4.5583
Jiangxi Province Rural Lowest Income Group	106.111	106.238	5.75914	5.87134
