# Supplementary material
Source: Research Square preprint supplement (doi:10.21203/rs.3.rs-9993564/v1)
Supplement: Supplementary file 7 [file e249187c21226888509208b5.xlsx]

## Sheet: Sheet1
Group	Change in Total Income Inequality（ΔT）
Gansu Province Urban	0.0154222
Gansu Province Rural	0.0429927
Henan Province Urban	0.047713
Henan Province Rural	0.00384809
Guangdong Province Urban	-0.0526127
Guangdong Province Rural	0.0196839
Liaoning Province Urban	-0.0465571
Liaoning Province Rural	0.0518361
Hebei Province Urban	0.0943762
Hebei Province Rural	0.00394145
Shanghai Municipality Urban	0.10802
Shandong Province Urban	-0.00343207
Shandong Province Rural	-0.0117763
Shanxi Province Urban	0.027222
Shanxi Province Rural	-0.0148223
Sichuan Province Urban	-0.0164336
Sichuan Province Rural	0.021168
Yunnan Province Urban	-0.0378167
Yunnan Province Rural	0.00372644
Heilongjiang Province Urban	0.0108249
Hunan Province Urban	0.0271875
Guizhou Province Urban	-0.065355
Guizhou Province Rural	0.0844776
Shaanxi Province Urban	-0.101107
Shaanxi Province Rural	0.018629
Zhejiang Province Urban	-0.14724
Jiangsu Province Urban	0.022046
Jilin Province Urban	0.0484387
Anhui Province Urban	-0.0121952
Guangxi ProvinceRural	0.0292855
Jiangxi Province Rural	0.095959
